## CORRESPONDENCE

3. Moorthy SS, Hilgenberg JC: Resistance to nondepolarizing muscle relaxants in paretic upper extremities of patients with hemiplegia. *Anesth Analg* 59:624-627, 1980

4. Iwasaki H, Namiki A, Omote K, Omote T, Takahashi T: Response differences of paretic and healthy upper extremities to pancuronium and neostigmine in hemiplegic patients. *Anesth Analg* 64:864-866, 1985

5. Benecke R, Berthold A, Conrad B: Denervation activity in the EMG of patients with upper motor neuron lesions: Time course, local distribution and pathogenetic aspects. *J Neurol* 230:143-151, 1983

6. Pop PHM, Notermans SLH, DeGraf R: Muscular denervation in lesions of the central nervous system and its correlation with motor function. *Acta Neurolog (Napoli)* 10:93-97, 1988

7. Fiacchino F, Bricchi M, Lasio G: Monitoring of curarization in patients with tetraparesis. *Anaesthesia* 45:128-131, 1990

8. Fiacchino F, Gemma M, Bricchi M, Giombini S, Regi B: Sensitivity to curare in patients with upper and lower motor neurone dysfunction. *Anaesthesia* 46:980-982, 1991

9. Rosenberg RN: Syrimyelia, Cecil Text Book of Medicine. Edited by Wyngarten JB, Smith LH. Philadelphia, WB Saunders, 1985 pp 2084

10. Fahim MA, Robbins N: Remodelling of the neuromuscular junction after total disuse. *Brain Res* 383:353-356, 1986

11. Gronert GA, Matteo RS, Perkins S: Canine gastrocnemius disuse

atrophy resistance to paralysis by dimethyl tubocurarine. *J Appl Physiol* 57:1502-1506, 1984

12. MacLagan J, Vrbova G: A study of increased sensitivity of denervated and re-innervated muscle to depolarizing drugs. *J Physiol (Lond)* 182:131-143, 1966

13. Rooke ED, Mulder DW, Eaton LM, Lambert EH: Studies of neuromuscular conduction in myasthenia gravis and related disorders, Myasthenia Gravis. Edited by Viets HR. Springfield, Charles C Thomas, 1961, pp 435-443

14. Yoshioka K, Miyata Y: Changes in the distribution of the extrajunctional acetylcholine sensitivity along muscle fibers during development and after cordotomy in the rat. *Neuroscience* 9:437-443, 1983

15. Carter JG, Sokoll MD, Gergis SD: Effect of spinal cord transection on neuromuscular junction in the rat. *ANESTHESIOLOGY* 55:542-546, 1981

16. Eldridge L, Liebhold M, Steinbach JH: Alterations in cat skeletal neuromuscular junctions following prolonged inactivity. *J Physiol (Lond)* 313:529-545, 1981

17. Brett RS, Schmidt JH, Gage JS, Schartel JA, Poppers PJ: Measurement of acetylcholine receptor concentration in skeletal muscle from a patient with multiple sclerosis and resistance to atracurium. *ANESTHESIOLOGY* 66:837-839, 1987

(Accepted for publication October 1, 1992.)

Anesthesiology  
78:218, 1993

© 1993 American Society of Anesthesiologists, Inc.  
J. B. Lippincott Company, Philadelphia

## Undetected Leak in Corrugated Circuit Tubing in Compressed Configuration

*To the Editor:*—We report an incident involving a disposable anesthesia circuit. The original compressed configuration of the circuit's corrugation showed no sign of a leak during a preoperative positive pressure test. However, after intravenous induction of general anesthesia, the tubing corrugation was extended and a previously undetected flaw in the circuit (fig. 1) became the source of a major leak. Ineffective positive pressure ventilation ensued, leading to a decline in the patient's hemoglobin oxygen saturation ( $Sp_{O_2}$ ). The circuit was abandoned for an ambu bag until the leak was identified and the circuit replaced. We suggest doing a preoperative positive pressure leak test with this type of circuit in the fully extended configuration to detect potential flaws in the circuit that might otherwise be missed.

**Douglas J. Reinhart, M.D.**  
Department of Anesthesia  
Clinical Faculty, University of Utah  
2571 South 1825 East  
Ogden, Utah 84401

**Ralph Friz, M.D.**  
Director of Anesthesia  
McKay-Dee Surgical Center  
3903 Harrison Boulevard  
Ogden, Utah 84409

(Accepted for publication October 13, 1992.)

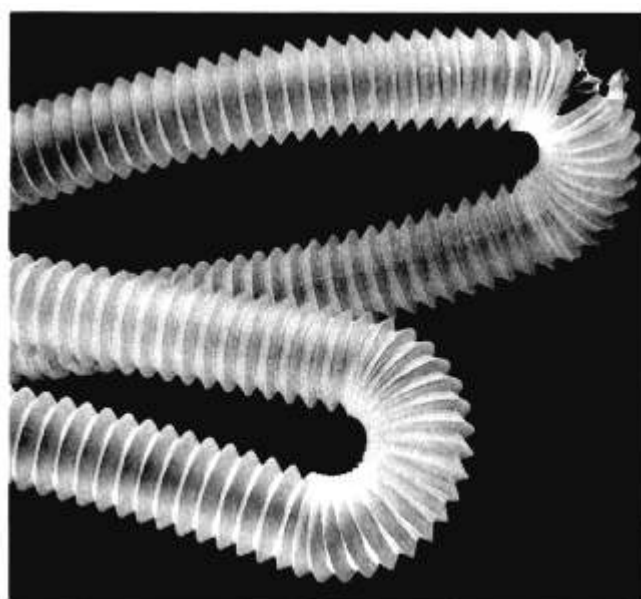

**Fig. 1. Corrugated tubing showing defect.**
